# Supplementary material for: Efficient orange and red thermally activated delayed fluorescence materials based on 1,8-naphthalimide derivatives
Source: Royal Society of Chemistry journal article supplement (doi:10.1039/d3ra08969j), 2024-01-01
Supplement: d3ra08969j1.pdf [file d3ra08969j1.pdf]

## Supporting Information

Efficient orange and red thermally activated delayed fluorescence  
materials based on 1,8-naphthalimide derivatives

Melling Chen<sup>ab</sup>, Yuzhuo Chen<sup>cd\*</sup>, Yan Li<sup>ac\*</sup>, Yuhong Lin<sup>e#</sup> and Yunan Wu<sup>f#</sup>

### CONTENTS

- 1. Structural Characterization Information**
- 2. Supporting Figures**
- 3. Supporting Tables**

## 1. Structural Characterization information

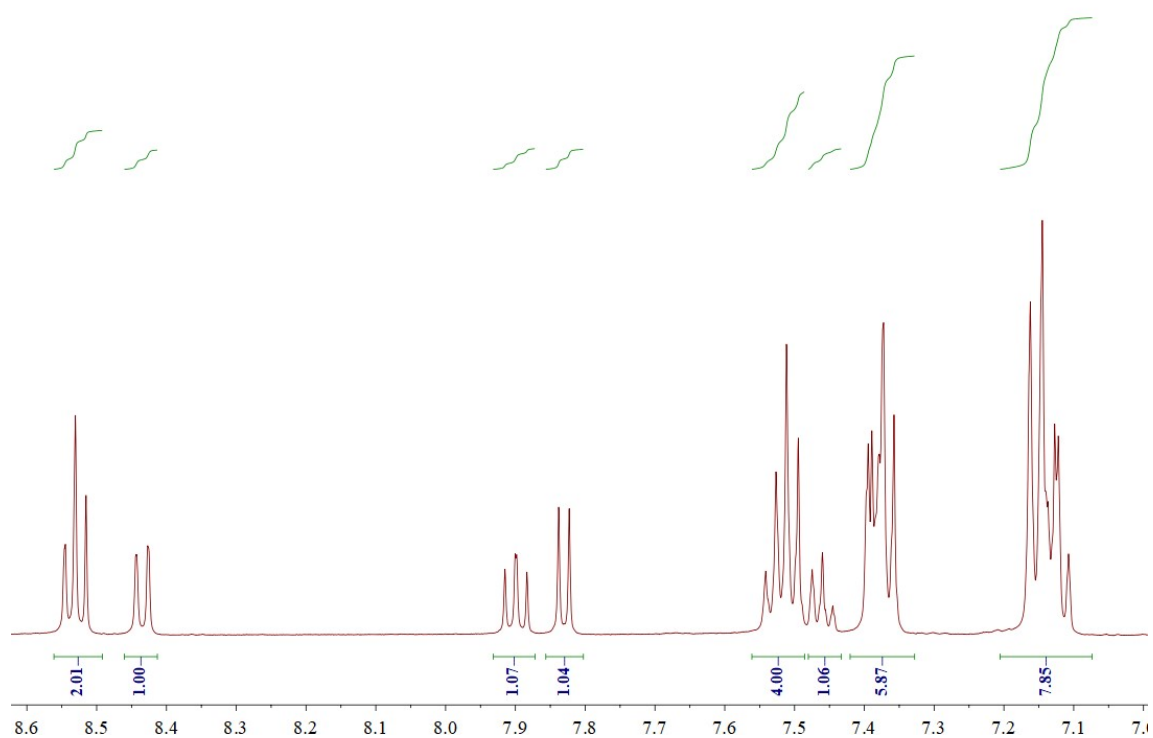

Figure S1  $^1\text{H}$  NMR spectrum of compound NI-TPA

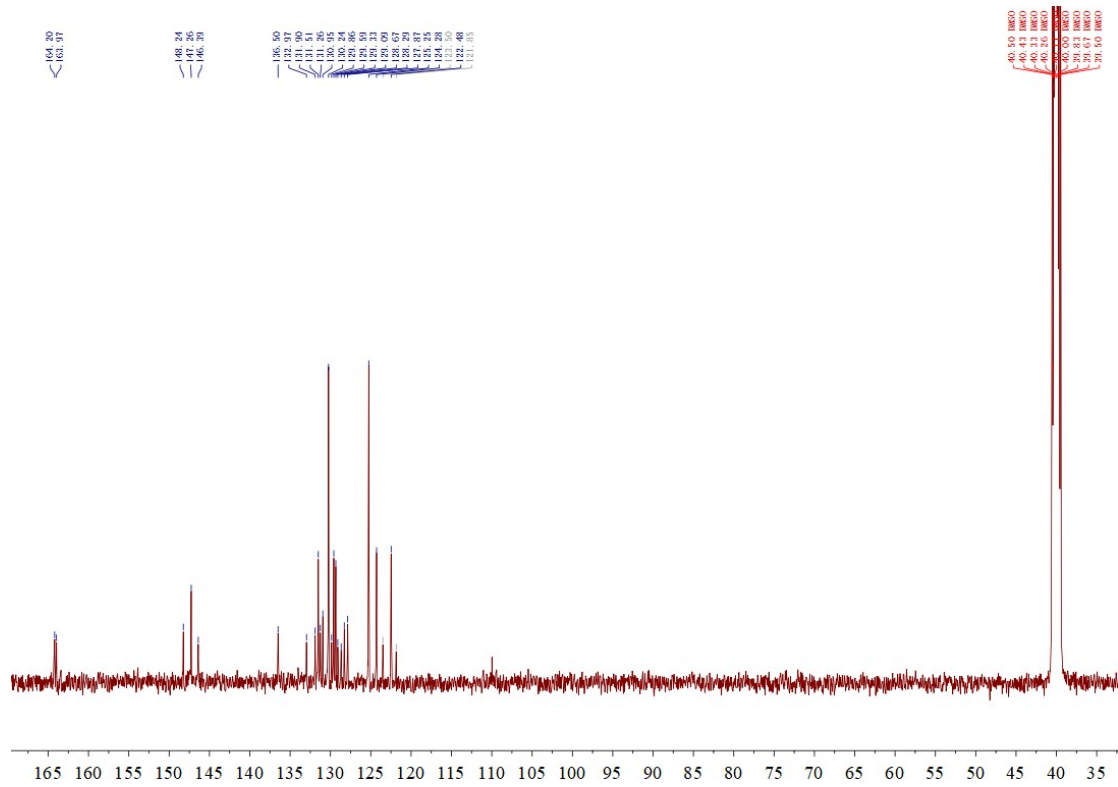

Figure S2  $^{13}\text{C}$  NMR spectrum of compound NI-TPA

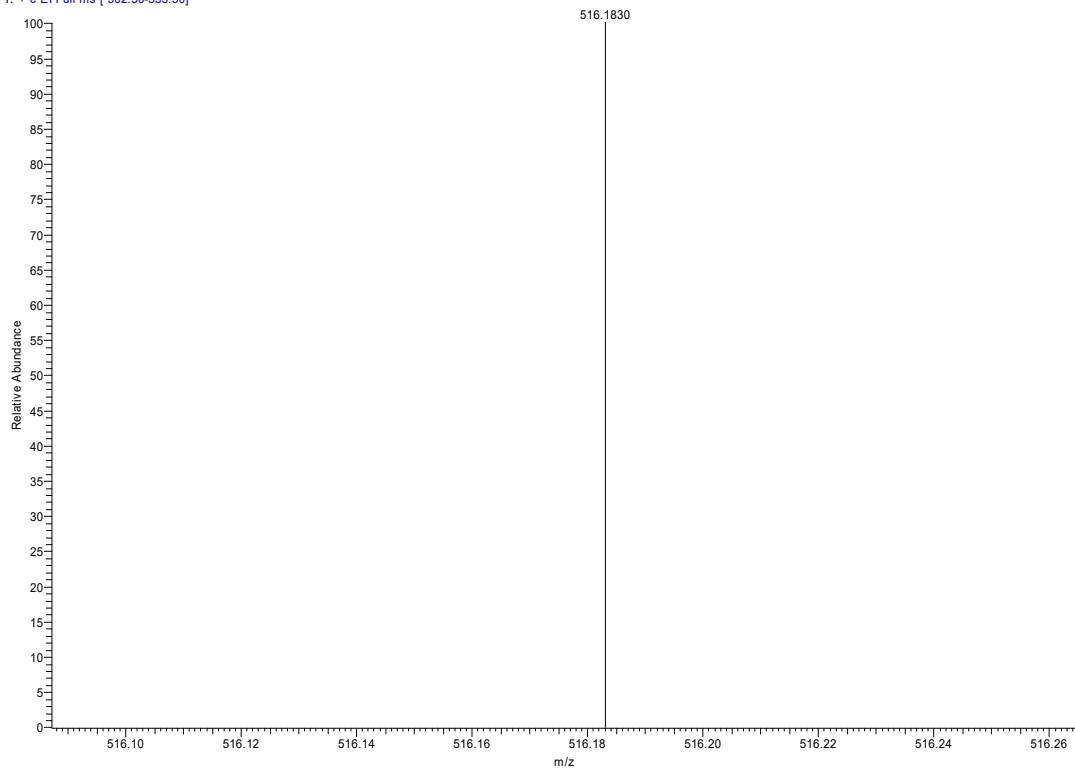

Figure S3 HRMS spectrum of compound NI-TPA.

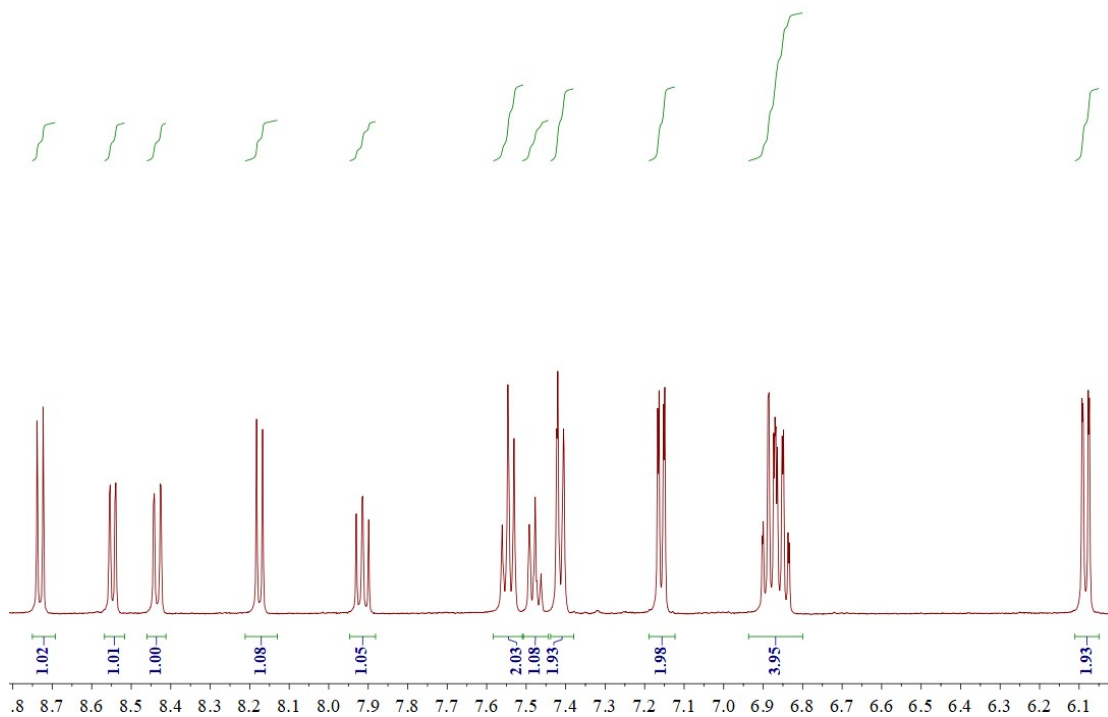

Figure S4  $^1\text{H}$  NMR spectrum of compound NI-Pz

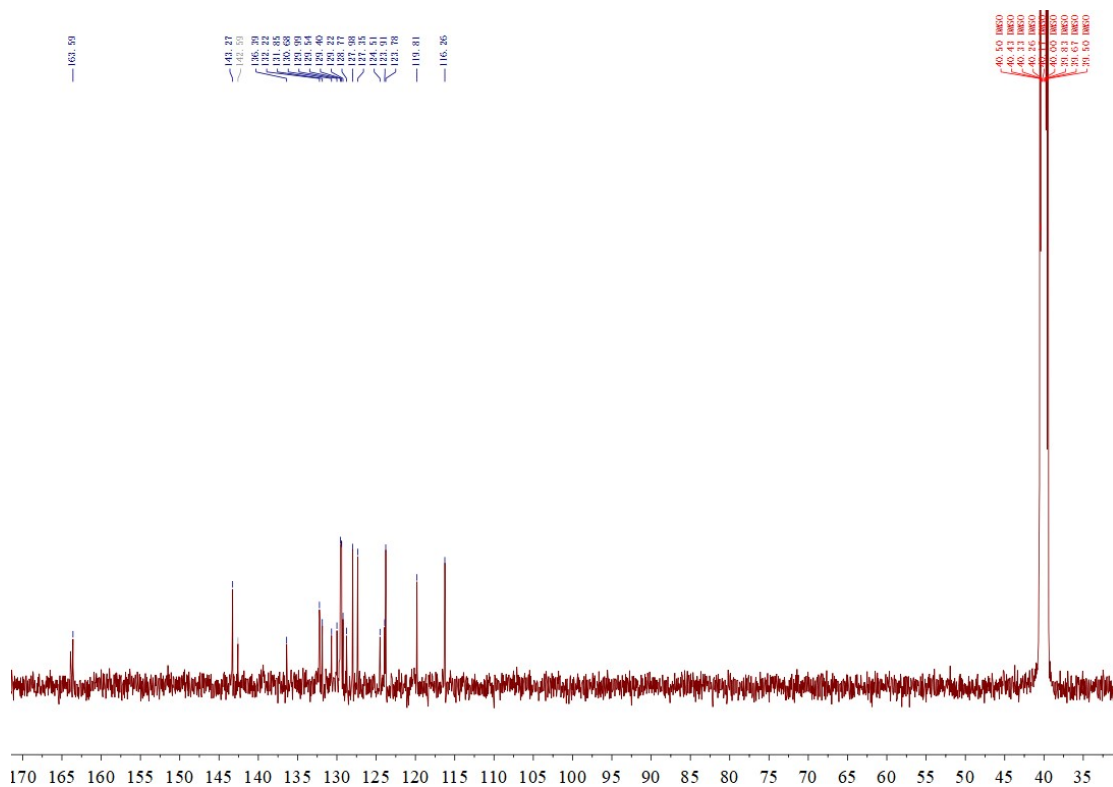

Figure S5  $^{13}\text{C}$  NMR spectrum of compound NI-Pz

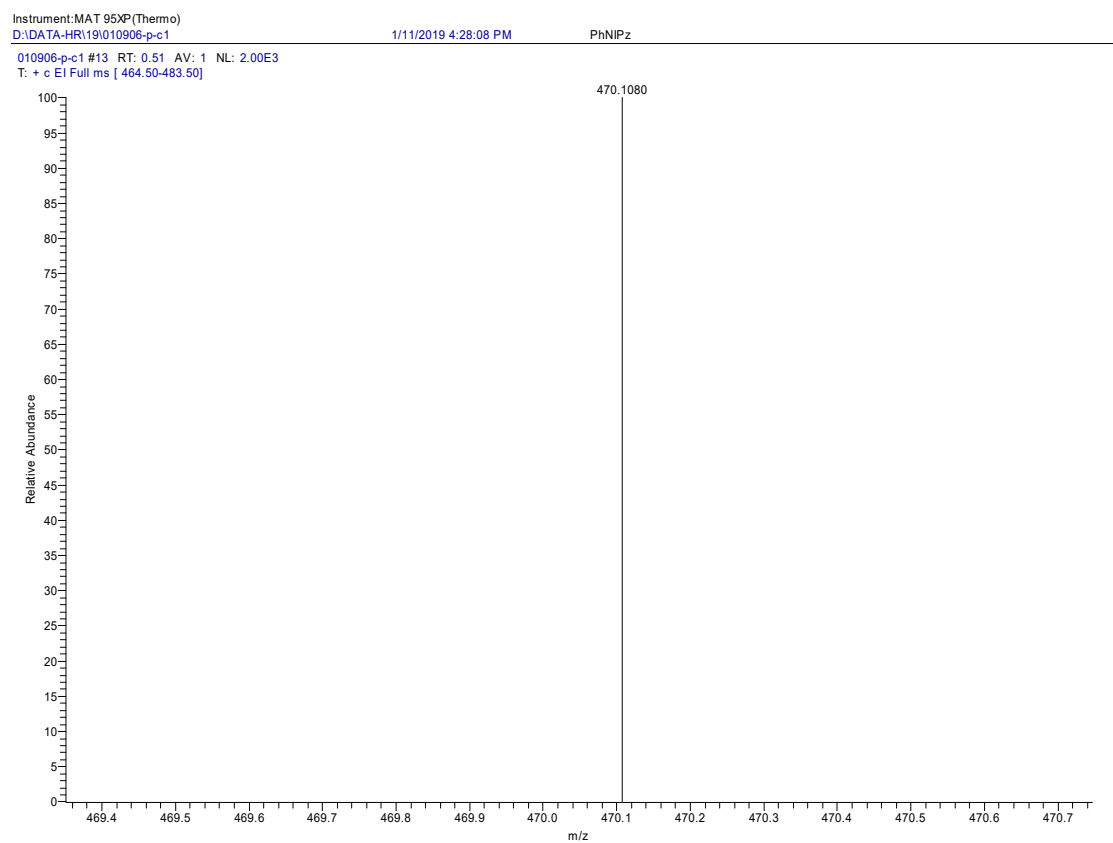

Figure S6 HRMS spectrum of compound NI-Pz.

## 2 Support figures

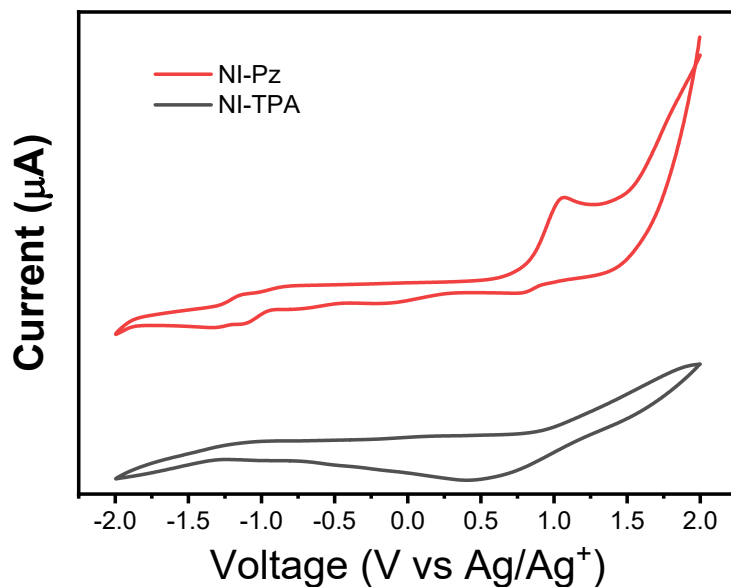

Figure S6 HRMS spectrum of compound NI-Pz.

## 3. Supporting Tables

Table S1 Crystal data and structure refinement for NI-TPA.

|                                       |                                                                   |
|---------------------------------------|-------------------------------------------------------------------|
| Identification code                   | NI-TPA                                                            |
| Empirical formula                     | C <sub>216</sub> H <sub>144</sub> N <sub>12</sub> O <sub>12</sub> |
| Formula weight                        | 3099.42                                                           |
| Temperature/K                         | 291.7(6)                                                          |
| Crystal system                        | triclinic                                                         |
| Space group                           | P1                                                                |
| a/Å                                   | 10.9035(4)                                                        |
| b/Å                                   | 16.1895(6)                                                        |
| c/Å                                   | 24.4187(17)                                                       |
| $\alpha$ /°                           | 102.495(5)                                                        |
| $\beta$ /°                            | 95.298(4)                                                         |
| $\gamma$ /°                           | 105.416(3)                                                        |
| Volume/Å <sup>3</sup>                 | 4005.2(4)                                                         |
| Z                                     | 1                                                                 |
| $\rho_{\text{calc}}$ /cm <sup>3</sup> | 1.285                                                             |

|                                                |                                                                |
|------------------------------------------------|----------------------------------------------------------------|
| $\mu/\text{mm}^{-1}$                           | 0.630                                                          |
| F(000)                                         | 1620.0                                                         |
| Crystal size/ $\text{mm}^3$                    | $0.2 \times 0.1 \times 0.05$                                   |
| Radiation                                      | CuK $\alpha$ ( $\lambda = 1.54184$ )                           |
| 2 $\theta$ range for data collection/ $^\circ$ | 7.512 to 149.804                                               |
| Index ranges                                   | $-13 \leq h \leq 13, -14 \leq k \leq 19, -30 \leq l \leq 28$   |
| Reflections collected                          | 24159                                                          |
| Independent reflections                        | 17835 [ $R_{\text{int}} = 0.0638, R_{\text{sigma}} = 0.0678$ ] |
| Data/restraints/parameters                     | 17835/3/2161                                                   |
| Goodness-of-fit on $F^2$                       | 1.384                                                          |
| Final R indexes [ $I \geq 2\sigma(I)$ ]        | $R_1 = 0.1377, wR_2 = 0.3838$                                  |
| Final R indexes [all data]                     | $R_1 = 0.1625, wR_2 = 0.4112$                                  |
| Largest diff. peak/hole / $e \text{ \AA}^{-3}$ | 0.75/-0.40                                                     |
| Flack parameter                                | -1.0(6)                                                        |

Table S2 Crystal data and structure refinement for NI-Pz.

|                                    |                                                            |
|------------------------------------|------------------------------------------------------------|
| Identification code                | NI-Pz                                                      |
| Empirical formula                  | $\text{C}_{60}\text{H}_{34}\text{N}_4\text{O}_4\text{S}_2$ |
| Formula weight                     | 939.03                                                     |
| Temperature/K                      | 119.99(10)                                                 |
| Crystal system                     | triclinic                                                  |
| Space group                        | P-1                                                        |
| $a/\text{\AA}$                     | 9.3848(3)                                                  |
| $b/\text{\AA}$                     | 13.2196(5)                                                 |
| $c/\text{\AA}$                     | 19.2723(6)                                                 |
| $\alpha/^\circ$                    | 79.837(3)                                                  |
| $\beta/^\circ$                     | 79.503(2)                                                  |
| $\gamma/^\circ$                    | 84.025(2)                                                  |
| Volume/ $\text{\AA}^3$             | 2307.68(14)                                                |
| Z                                  | 2                                                          |
| $\rho_{\text{calc}}/\text{g/cm}^3$ | 1.351                                                      |
| $\mu/\text{mm}^{-1}$               | 1.496                                                      |
| F(000)                             | 972.0                                                      |
| Crystal size/ $\text{mm}^3$        | $0.6 \times 0.05 \times 0.02$                              |
| Radiation                          | CuK $\alpha$ ( $\lambda = 1.54184$ )                       |

|                                                  |                                                                       |
|--------------------------------------------------|-----------------------------------------------------------------------|
| 2 $\Theta$ range for data collection/ $^{\circ}$ | 7.642 to 148.492                                                      |
| Index ranges                                     | -11 $\leq$ h $\leq$ 8, -16 $\leq$ k $\leq$ 15, -23 $\leq$ l $\leq$ 24 |
| Reflections collected                            | 16603                                                                 |
| Independent reflections                          | 9130 [ $R_{\text{int}} = 0.0269$ , $R_{\text{sigma}} = 0.0381$ ]      |
| Data/restraints/parameters                       | 9130/0/631                                                            |
| Goodness-of-fit on $F^2$                         | 1.038                                                                 |
| Final R indexes [ $I \geq 2\sigma(I)$ ]          | $R_1 = 0.0385$ , $wR_2 = 0.1011$                                      |
| Final R indexes [all data]                       | $R_1 = 0.0425$ , $wR_2 = 0.1048$                                      |
| Largest diff. peak/hole / e $\text{\AA}^{-3}$    | 0.81/-0.26                                                            |

**Table S3** The fitting parameters for decay lifetimes of NI-TPA and NI-Pz neat films in Figure 5a and figure 5b.

| Compounds | Tem. (K) | $T_1$ ( $\mu\text{s}$ ) | $A_1$ (%) | $T_2$ ( $\mu\text{s}$ ) | $A_2$ (%) | $T_{\text{average}}$ |
|-----------|----------|-------------------------|-----------|-------------------------|-----------|----------------------|
| NI-TPA    | 100      |                         |           |                         |           |                      |
|           | 200      |                         |           |                         |           |                      |
|           | 300      |                         |           |                         |           |                      |
| NI-Pz     | 100      |                         |           |                         |           |                      |
|           | 200      |                         |           |                         |           |                      |
|           | 300      |                         |           |                         |           |                      |

Tem., temperature;  $T_1$  and  $T_2$ , lifetime components;  $A_1$  and  $A_2$ , the ratios of lifetime components;  $T_{\text{average}}$ , the average lifetime,  $T_{\text{average}} = T_1 \times A_1 + T_2 \times A_2$ .

**Table S4** Energy levels of the lowest singlet and triplet excited states of NI-TPA and NI-Pz.

| Compound | $S_1$ (eV) | $T_1$ (eV) | $\Delta E_{\text{ST}}$ (eV) |
|----------|------------|------------|-----------------------------|
| NI-TPA   | 2.56       | 2.45       | 0.11                        |
| NI-Pz    | 2.27       | 2.15       | 0.12                        |

The energy levels are calculated from the onsets of their spectra in Figure 2.
